# Supplementary material
Source: Research Square preprint supplement (doi:10.21203/rs.3.rs-9143984/v1)
Supplement: Supplementary file 1 [file 4a73e9152617fe4d3cb81b86.xlsx]

## Sheet: PF3D7_1343700 Kelch13
Table S1-1. PF3D7_1343700 Kelch13
PRR	Sample ID	GC(%)	Sequencing Depth Average (number of read)	PF3D7_1343700 Kelch13
					Nsyn																																		Syn				Indel
				Position (Nucl)	Position (AA)	N of NGS reads	n	%	Position (Nucl)	Position (AA)	N of NGS reads	n	%	Position (Nucl)	Position (AA)	N of NGS reads	n	%	Position (Nucl)	Position (AA)	N of NGS reads	n	%	Position (Nucl)	Position (AA)	N of NGS reads	n	%	Position (Nucl)	Position (AA)	N of NGS reads	n	%	Position (Nucl)	Position (AA)	N of NGS reads	n	%	Position (Nucl)	N of NGS reads	n	%	Position (Nucl)	Position (AA)	N of NGS reads
≥ 80%	BIY016	21	154.523																										C1076C	A359A	195	0	0
																													C1076T	A360V		195	1
	BIY024	20	135.291
	BIY084	20	140.991
	BIY095	20	128.55
	K015	20	122.88
	K026	20	119.019											a566a	K189K	126	78	0.619048
														a566c	K189T		43	0.34127
	K030	20	155.574
	K031	20	158.59
	K085	22	110.18
	K095	20	124.268
	MAL005	22	110.31
	MAL017	22	113.67	t134t	F45F	109	4	0.0366972																																			ata Ins between c406 & a407	N between N136 & L137	34/59
				t134a	F45Y		105	0.963303
	MAL038	24	200.669																																								ata Ins between c406 & a407	N between N136 & L137	53/93
	MAL040	23	74.43											a566a	K189K	89	66	0.741573																									ata Ins between c406 & a407	NN between N136 & L137	5/37
														a566c	K189T		23	0.258427
	MAL051	20	134.399						a448a	T149T	123	77	0.626016	a566a	K189K	146	53	0.363014
									a448t	T149S		46	0.373984	a566c	K189T		93	0.636986
	MAL079	21	126.047
	MAL083	20	153.449																					g764g	R255R	169	67	0.39645
																								g764a	R255K		98	0.579882
	MAL084	22	113.29																a567a	K189K	113	12	0.106195											a1182a	I394I	163	18	0.110429	t355t	90	13	0.144444
																			a567t	K189N		101	0.893805											a1182g	I394M		144	0.883436	t355c		77	0.855556
	MAL087	21	122.567
	MAL091	22	105.53																					g764g	R255R	171	9	0.0526316
																								g764a	R255K		157	0.918129
	MAL100	21	118.19
	MAL101	21	125.04
< 80%	BIY037	22	114.16
	BIY055	23	138.63											a566a	K189K	173	7	0.0404624
														a566c	K189T		166	0.959538
	BIY088	22	127.73											a566a	K189K	173	88	0.508671
														a566c	K189T		85	0.491329
	K023	31	189.002
	K048	26	175.713
	MAL010	28	175.713											a566a	K189K	68	0	0
														a566c	K189T		68	1
	MAL012	26	141.22
	MAL013	23	249.17
	MAL031	22	111.76
Fisher's exact test two-tailed				variant	3D7-type	P			variant	3D7-type	P			variant	3D7-type	P			variant	3D7-type	P			variant	3D7-type	P			variant	3D7-type	P			variant	3D7-type	P			variant	3D7-type	P		variant	3D7-type	P
			≥ 80%	1	21	1			1	21	1			3	19	0.32			1	21	1			2	20	0.574			1	21	1			1	21	1			1	21	1		3	19	0.537
			< 80%	0	9				0	9				3	6				0	9				0	9				0	9				0	9				0	9			0	9
Number of polymorphic sites				9

## Sheet: PF3D7_1251200 Coronin
Table S1-2. PF3D7_1251200 Coronin
PRR	Sample ID	GC(%)	Sequencing Depth Average (number of read)	PF3D7_1251200 Coronin
				Nsyn																									Syn
				Position (Nucl)	Position (AA)	N of NGS reads	n	%	Position (Nucl)	Position (AA)	N of NGS reads	n	%	Position (Nucl)	Position (AA)	N of NGS reads	n	%	Position (Nucl)	Position (AA)	N of NGS reads	n	%	Position (Nucl)	Position (AA)	N of NGS reads	n	%	Position (Nucl)	N of NGS reads	n	%	Position (Nucl)	N of NGS reads	n	%	Position (Nucl)	N of NGS reads	n	%	Position (Nucl)	N of NGS reads	n	%
≥ 80%	BIY016	21	154.523						a547a	S183S	179	2	0.0111732																a636a	179	0	0
									a547g	S183G		177	0.988827																a636g		177	0.988827
	BIY024	20	135.291						a547a	S183S	126	0	0																a636a	137	0	0
									a547g	S183G		126	1																a636g		137	1
	BIY084	20	140.991						a547a	S183S	160	0	0																a636a	158	0	0
									a547g	S183G		159	0.99375																a636g		158	1
	BIY095	20	128.55						a547a	S183S	115	3	0.026087																a636a	118	0	0
									a547g	S183G		112	0.973913																a636g		118	1
	K015	20	122.88						a547a	S183S	134	1	0.00746269																a636a	155	0	0
									a547g	S183G		133	0.992537																a636g		155	1
	K026	20	119.019						a547a	S183S	121	57	0.471074																a636a	101	0	0
									a547g	S183G		64	0.528926																a636g		100	1
	K030	20	155.574						a547a	S183S	229	4	0.0174672																a636a	238	0	0
									a547g	S183G		223	0.973799																a636g		235	0.987395
	K031	20	158.59						a547a	S183S	173	1	0.00578035																a636a	200	0	0	t864t	141	2	0.0141844
									a547g	S183G		171	0.988439																a636g		200	1	t864c		139	0.985816
	K085	22	110.18						a547a	S183S	130	4	0.0307692																a636a	114	0	0
									a547g	S183G		125	0.961538																a636g		112	0.982456
	K095	20	124.268						a547a	S183S	151	0	0																a636a	173	0	0
									a547g	S183G		151	1																a636g		173	1
	MAL005	22	110.31						a547a	S183S	157	0	0																a636a	180	0	0
									a547g	S183G		157	1																a636g		180	1
	MAL017	22	113.67						a547a	S183S	145	0	0	g1270g	V424V	208	4	0.0192308	c1302c	F434F	203	7	0.0344828						a636a	142	0	0
									a547g	S183G		144	0.993103	g1270a	V424I		202	0.971154	c1302a	F434L		196	0.965517						a636g		140	0.985915
	MAL038	24	200.669						a547a	S183S	329	39	0.118541																a636a	359	0	0
									a547g	S183G		292	0.887538																a636g		359	1
	MAL040	23	74.43						a547a	S183S	73	0	0																a636a	76	0	0
									a547g	S183G		73	1																a636g		76	0
	MAL051	20	134.399						a547a	S183S	166	49	0.295181																a636a	168	0	1
									a547g	S183G		117	0.704819																a636g		167	0.994048
	MAL079	21	126.047						a547a	S183S	159	1	0.00628931																a636a	150	0	0
									a547g	S183G		155	0.974843																a636g		149	0.993333
	MAL083	20	153.449						a547a	S183S	213	2	0.00938967																a636a	190	0	0
									a547g	S183G		211	0.99061																a636g		190	1
	MAL084	22	113.29						a547a	S183S	133	1	0.0075188																a636a	129	0	0
									a547g	S183G		131	0.984962																a636g		129	1
	MAL087	21	122.567						a547a	S183S	159	0	0	g1270g	V424V	120	0	0	c1302c	F434F	132	0	0						a636a	163	0	0
									a547g	S183G		156	0.981132	g1270a	V424I		120	1	c1302a	F434L		100	1						a636g		163	1
	MAL091	22	105.53																										a636a	188	0	0
																													a636g		188	1
	MAL100	21	118.19						a547a	S183S	147	27	0.183673																a636a	132	0	0
									a547g	S183G		119	0.809524																a636g		100	1
	MAL101	21	125.04						a547a	S183S	182	0	0																a636a	138	0	0
									a547g	S183G		100	1																a636g		138	1
< 80%	BIY037	22	114.16																										a636a	172	0	0
																													a636g		172	1
	BIY055	23	138.63						a547a	S183S	186	69	0.370968																a636a	235	0	0
									a547g	S183G		117	0.629032																a636g		235	1
	BIY088	22	127.73	c226c	P76P	164	48	0.292683																					a636a	221	0	0
				c226t	P76S		116	0.707317																					a636g		221	1
	K023	31	189.002						a547a	S183S	432	13	0.0300926																a636a	575	1	0.00173913
									a547g	S183G		419	0.969907																a636g		574	0.998261
	K048	26	175.713																										a636a	510	0	0									c1479c	339	0	0
																													a636g		510	1									c1479t		100	1
	MAL010	28	175.713						a547a	S183S	411	9	0.0218978																a636a	475	2	0.00421053
									a547g	S183G		402	0.978102																a636g		473	0.995789
	MAL012	26	141.22	c226c	P76P	229	140	0.611354	a547a	S183S	355	6	0.0169014	g1270g	V424V	402	160	0.39801											a636a	445	0	0					c900c	432	242	0.560185
				c226t	P76S		89	0.388646	a547g	S183G		348	0.980282	g1270a	V424I		240	0.597015											a636g		445	1					c900t		190	0.439815
	MAL013	23	249.17						a547a	S183S	392	24	0.0612245											g1582g	D528D	270	10	0.037037	a636a	418	0	0
									a547g	S183G		368	0.938776											g1582a	D528N		256	0.948148	a636g		417	0.997608
	MAL031	22	111.76						a547a	S183S	146	0	0																a636a	145	0	0
									a547g	S183G		146	1																a636g		144	0.993103
Fisher's exact test two-tailed				variant	3D7-type	P			variant	3D7-type	P			variant	3D7-type	P			variant	3D7-type	P			variant	3D7-type	P			variant	3D7-type	P		variant	3D7-type	P		variant	3D7-type	P		variant	3D7-type	P
			≥ 80%	0	22	0.077			21	1	0.063			2	20	1			2	20	0.574			0	22	0.29			22	0	not significant		1	21	1		0	22	0.29		0	22	0.29
			< 80%	2	7				6	3				1	8				0	9				1	8				9	0			0	9			1	8			1	8
Number of polymorphic sites				9

## Sheet: PF3D7_1246300 KIC4
Table S1-3. 3D7_1246300 KIC4
PRR	Sample ID	GC(%)	Sequencing Depth Average (number of read)	3D7_1246300 KIC4
				Nsyn																																								Syn
				Position (Nucl)	Position (AA)	N of NGS reads	n	%	Position (Nucl)	Position (AA)	N of NGS reads	n	%	Position (Nucl)	Position (AA)	N of NGS reads	n	%	Position (Nucl)	Position (AA)	N of NGS reads	n	%	Position (Nucl)	Position (AA)	N of NGS reads	n	%	Position (Nucl)	Position (AA)	N of NGS reads	n	%	Position (Nucl)	Position (AA)	N of NGS reads	n	%	Position (Nucl)	Position (AA)	N of NGS reads	n	%	Position (Nucl)	N of NGS reads	n	%	Position (Nucl)	N of NGS reads
≥ 80%	BIY016	21	154.523																																													t1041t	159
																																																t1041c
	BIY024	20	135.291	g46g	D16D	61	1	0.0163934						g853g	E285E	104	0	0																														t1041t	113
				g46a	D16N		60	0.983607						g853a	E285K		104	1																														t1041c
	BIY084	20	140.991																																													t1041t	119
																																																t1041c
	BIY095	20	128.55																																													t1041t	98
																																																t1041c
	K015	20	122.88																															a1734a	K578K	111	1	0.00900901										t1041t	84
																																		a1734t	K578N		110	0.990991										t1041c
	K026	20	119.019																																													t1041t	105
																																																t1041c
	K030	20	155.574																																													t1041t	167
																																																t1041c
	K031	20	158.59																																													t1041t	170
																																																t1041c
	K085	22	110.18																																													t1041t	117
																																																t1041c
	K095	20	124.268																										a1681a	K561K	135	0	0															t1041t	141
																													a1681g	K561E		135	1															t1041c
	MAL005	22	110.31																																													t1041t	116
																																																t1041c
	MAL017	22	113.67																																													t1041t	145
																																																t1041c
	MAL038	24	200.669																																													t1041t	213
																																																t1041c
	MAL040	23	74.43																																													t1041t	86
																																																t1041c
	MAL051	20	134.399																					g1603g	D535D	155	89	0.574194																				t1041t	126
																								g1603a	D535I		64	0.412903																				t1041c
	MAL079	21	126.047																																													t1041t	100
																																																t1041c
	MAL083	20	153.449																																													t1041t	141
																																																t1041c
	MAL084	22	113.29																																													t1041t	112
																																																t1041c
	MAL087	21	122.567																																													t1041t	146
																																																t1041c
	MAL091	22	105.53																a1309a	N437N	52	4	0.0769231																									t1041t	121
																			a1309g	N437D		39	0.75																									t1041c
	MAL100	21	118.19																																													t1041t	119
																																																t1041c
	MAL101	21	125.04																																													t1041t	97
																																																t1041c
< 80%	BIY037	22	114.16																																				c1841c	T614T	166	79	0.475904					t1041t	165
																																							c1841a	T614K		85	0.512048					t1041c
	BIY055	23	138.63																																													t1041t	228
																																																t1041c
	BIY088	22	127.73																																													t1041t	183
																																																t1041c
	K023	31	189.002																																													t1041t	41
																																																t1041c
	K048	26	175.713
	MAL010	28	175.713																																													t1041t	193
																																																t1041c
	MAL012	26	141.22						a361a	I121I	36	11	0.305556																															c818c	93	33	0.354839	t1041t	165
									a361g	I121V		24	0.666667																															c818g		60	0.645161	t1041c
	MAL013	23	249.17																																													t1041t	273
																																																t1041c
	MAL031	22	111.76																																													t1041t	128
																																																t1041c
Fisher's exact test two-tailed				variant	3D7-type	P			variant	3D7-type	P			variant	3D7-type	P			variant	3D7-type	P			variant	3D7-type	P			variant	3D7-type	P			variant	3D7-type	P			variant	3D7-type	P			variant	3D7-type	P		variant	3D7-type
			≥ 80%	1	21	1			0	22	0.29			1	21	1			1	21	1			1	21	1			1	21	1			1	21	1			0	22	0.29			0	22	0.29		22	0
			< 80%	0	9				1	8				0	9				0	9				0	9				0	9				0	9				1	8				1	8			8	1
Number of polymorphic sites				12
[truncated: 10 more columns]

## Sheet: PF3D7_1138700 KIC5
Table S1-4. PF3D7_1138700 KIC5
PRR	Sample ID	GC(%)	Sequencing Depth Average (number of read)	PF3D7_1138700 KIC5
				Nsyn
				Position (Nucl)	Position (AA)	N of NGS reads	n	%	Position (Nucl)	Position (AA)	N of NGS reads	n	%	Position (Nucl)	Position (AA)	N of NGS reads	n	%	Position (Nucl)	Position (AA)	N of NGS reads	n	%	Position (Nucl)	Position (AA)	N of NGS reads	n	%	Position (Nucl)	Position (AA)	N of NGS reads	n	%	Position (Nucl)	Position (AA)	N of NGS reads	n	%	Position (Nucl)	Position (AA)	N of NGS reads	n	%	Position (Nucl)	Position (AA)	N of NGS reads	n	%	Position (Nucl)
≥ 80%	BIY016	21	154.523																																				g1898g	S633S	157	60	0.382166
																																							g1898a	S633N		96	0.611465
	BIY024	20	135.291																																				g1898g	S633S	155	33	0.212903
																																							g1898a	S633N		122	0.787097
	BIY084	20	140.991																										g1489g	E497E	149	0	0						g1898g	S633S	151	3	0.0198675
																													g1489c	E497Q		148	0.993289						g1898a	S633N		143	0.94702
	BIY095	20	128.55																										g1489g	E497E	125	0	0						g1898g	S633S	119	57	0.478992
																													g1489c	E497Q		125	1						g1898a	S633N		60	0.504202
	K015	20	122.88																										g1489g	E497E	138	0	0						g1898g	S633S	148	64	0.432432
																													g1489c	E497Q		138	1						g1898a	S633N		83	0.560811
	K026	20	119.019																										g1489g	E497E	132	36	0.272727						g1898g	S633S	110	45	0.409091
																													g1489c	E497Q		95	0.719697						g1898a	S633N		65	0.590909
	K030	20	155.574																g766g	D256D	175	47	0.268571																g1898g	S633S	145	45	0.310345						c2896c
																			g766t	D256Y		127	0.725714																g1898a	S633N		100	0.689655						c2896g
	K031	20	158.59											c665c	T222T	158	0	0											g1489g	E497E	148	0	0						g1898g	S633S	186	69	0.370968
														c665g	T222S		155	0.981013											g1489c	E497Q		148	1						g1898a	S633N		115	0.61828
	K085	22	110.18	c412c	H138H	146	7	0.0479452																					g1489g	E497E	125	0	0						g1898g	S633S	141	4	0.0283688
				c412t	H138Y		138	0.945205																					g1489c	E497Q		124	0.992						g1898a	S633N		137	0.971631
	K095	20	124.268																																				g1898g	S633S	120	56	0.466667
																																							g1898a	S633N		64	0.533333
	MAL005	22	110.31																										g1489g	E497E	142	0	0						g1898g	S633S	116	1	0.00862069
																													g1489c	E497Q		140	0.985915						g1898a	S633N		112	0.965517
	MAL017	22	113.67																										g1489g	E497E	135	0	0						g1898g	S633S	144	45	0.3125
																													g1489c	E497Q		135	1						g1898a	S633N		97	0.673611
	MAL038	24	200.669																										g1489g	E497E	235	0	0
																													g1489c	E497Q		235	1
	MAL040	23	74.43																										g1489g	E497E	82	1	0.0121951
																													g1489c	E497Q		81	0.987805
	MAL051	20	134.399																										g1489g	E497E	132	0	0						g1898g	S633S	138	45	0.326087
																													g1489c	E497Q		132	1						g1898a	S633N		92	0.666667
	MAL079	21	126.047																										g1489g	E497E	100	7	0.07						g1898g	S633S	116	57	0.491379
																													g1489c	E497Q		93	0.93						g1898a	S633N		59	0.508621
	MAL083	20	153.449																																				g1898g	S633S	182	109	0.598901
																																							g1898a	S633N		71	0.39011
	MAL084	22	113.29																										g1489g	E497E	129	0	0						g1898g	S633S	132	51	0.386364
																													g1489c	E497Q		129	1						g1898a	S633N		81	0.613636
	MAL087	21	122.567																										g1489g	E497E	123	0	0						g1898g	S633S	136	33	0.242647
																													g1489c	E497Q		123	1						g1898a	S633N		103	0.757353
	MAL091	22	105.53																										g1489g	E497E	119	0	0						g1898g	S633S	138	66	0.478261
																													g1489c	E497Q		119	1						g1898a	S633N		72	0.521739
	MAL100	21	118.19																										g1489g	E497E	119	0	0						g1898g	S633S	120	49	0.408333
																													g1489c	E497Q		119	1						g1898a	S633N		70	0.583333
	MAL101	21	125.04	c412c	H138H	137	0	0	a512a	E171E	158	1	0.00632911																g1489g	E497E	195	0	0						g1898g	S633S	179	64	0.357542
				c412t	H138Y		136	1	a512g	E171G		157	0.993671																g1489c	E497Q		195	1						g1898a	S633N		112	0.625698
< 80%	BIY037	22	114.16	c412c	H138H	119	36	0.302521																					g1489g	E497E	150	25	0.166667						g1898g	S633S	156	59	0.378205
				c412t	H138Y		82	0.689076																					g1489c	E497Q		124	0.826667						g1898a	S633N		95	0.608974
	BIY055	23	138.63																										g1489g	E497E	199	0	0						g1898g	S633S	199	66	0.331658
																													g1489c	E497Q		198	1						g1898a	S633N		132	0.663317
	BIY088	22	127.73																										g1489g	E497E	199	0	0						g1898g	S633S	188	70	0.37234
																													g1489c	E497Q		197	0.98995						g1898a	S633N		118	0.62766
	K023	31	189.002																																				g1898g	S633S	247	49	0.198381
																																							g1898a	S633N		198	0.801619
	K048	26	175.713																										g1489g	E497E	90	0	0						g1898g	S633S	299	81	0.270903
																													g1489c	E497Q		90	1						g1898a	S633N		218	0.729097
	MAL010	28	175.713																										g1489g	E497E	123	1	0.00813008						g1898g	S633S	371	152	0.409704
																													g1489c	E497Q		121	0.98374						g1898a	S633N		219	0.590296
	MAL012	26	141.22																					a1415a	N472N	97	41	0.42268	g1489g	E497E	114	0	0	c1730c	P577P	145	74	0.510345	g1898g	S633S	209	73	0.349282
																								a1415g	N472S		56	0.57732	g1489c	E497Q		114	1	c1730t	P577L		71	0.489655	g1898a	S633N		136	0.650718
	MAL013	23	249.17																																				g1898g	S633S	380	162	0.426316
																																							g1898a	S633N		218	0.573684
	MAL031	22	111.76																										g1489g	E497E	164	0	0						g1898g	S633S	135	45	0.333333	g2216g	S739S	154	0	0
																													g1489c	E497Q		163	0.993902						g1898a	S633N		90	0.666667	g2216t	S739I		154	1
Fisher's exact test two-tailed				variant	3D7-type	P			variant	3D7-type	P			variant	3D7-type	P			variant	3D7-type	P			variant	3D7-type	P			variant	3D7-type	P			variant	3D7-type	P			variant	3D7-type	P			variant	3D7-type	P			variant
			≥ 80%	2	20	1			1	21	1			1	21	1			1	21	1			0	22	0.29			17	5	1			0	22	0.29			20	2	0.574			0	22	0.29			1
			< 80%	1	8				0	9				0	9				0	9				1	8				7	2				1	8				9	0				1	8				0
Number of polymorphic sites				25
[truncated: 65 more columns]

## Sheet: PF3D7_0813000 KIC7
Table S1-5. PF3D7_0813000 KIC7
PRR	Sample ID	GC(%)	Sequencing Depth Average (number of read)	PF3D7_0813000 KIC7
				Nsyn																				Syn
				Position (Nucl)	Position (AA)	N of NGS reads	n	%	Position (Nucl)	Position (AA)	N of NGS reads	n	%	Position (Nucl)	Position (AA)	N of NGS reads	n	%	Position (Nucl)	Position (AA)	N of NGS reads	n	%	Position (Nucl)	N of NGS reads	n	%
≥ 80%	BIY016	21	154.523
	BIY024	20	135.291
	BIY084	20	140.991
	BIY095	20	128.55						a1301a	N434N	94	0	0						g1727g	S576S	81	0	0	a1641a	93	1	0.0107527
									a1301g	N434S		94	0.94						g1727a	S576N		81	1	a1641g		91	0.978495
	K015	20	122.88
	K026	20	119.019
	K030	20	155.574
	K031	20	158.59
	K085	22	110.18						a1301a	N434N	121	9	0.0743802						g1727g	S576S	63	0	0
									a1301g	N434S		112	0.92562						g1727a	S576N		61	0.968254
	K095	20	124.268
	MAL005	22	110.31
	MAL017	22	113.67
	MAL038	24	200.669
	MAL040	23	74.43
	MAL051	20	134.399
	MAL079	21	126.047
	MAL083	20	153.449																g1727g	S576S	116	26	0.224138
																			g1727a	S576N		90	0.775862
	MAL084	22	113.29
	MAL087	21	122.567
	MAL091	22	105.53
	MAL100	21	118.19
	MAL101	21	125.04
< 80%	BIY037	22	114.16
	BIY055	23	138.63	g957g	M319M	157	3	0.0191083
				g957a	M319I		153	0.974522
	BIY088	22	127.73
	K023	31	189.002
	K048	26	175.713
	MAL010	28	175.713
	MAL012	26	141.22
	MAL013	23	249.17											a1534a	M512M	305	12	0.0393443
														a1534g	M512V		293	0.960656
	MAL031	22	111.76						a1301a	N434N	136	20	0.147059
									a1301g	N434S		116	0.852941
Fisher's exact test two-tailed				variant	3D7-type	P			variant	3D7-type	P			variant	3D7-type	P			variant	3D7-type	P			variant	3D7-type	P
			≥ 80%	0	22	0.29			2	20	1			0	22	0.29			3	19	0.537			1	21	1
			< 80%	1	8				1	8				1	8				0	9				0	9
Number of polymorphic sites				5

## Sheet: PF3D7_0720700 PX1
Table S1-6. PF3D7_0720700 PfPX1
PRR	Sample ID	GC(%)	Sequencing Depth Average (number of read)	PF3D7_0720700 PfPX1
				Nsyn
				Position (Nucl)	Position (AA)	N of NGS reads	n	%	Position (Nucl)	Position (AA)	N of NGS reads	n	%	Position (Nucl)	Position (AA)	N of NGS reads	n	%	Position (Nucl)	Position (AA)	N of NGS reads	n	%	Position (Nucl)	Position (AA)	N of NGS reads	n	%	Position (Nucl)	Position (AA)	N of NGS reads	n	%	Position (Nucl)	Position (AA)	N of NGS reads	n	%	Position (Nucl)	Position (AA)	N of NGS reads	n	%	Position (Nucl)	Position (AA)	N of NGS reads	n	%	Position (Nucl)
≥ 80%	BIY016	21	154.523
	BIY024	20	135.291																					g1882g	D628D	145	73	0.503448
																								g1882t	D628Y		72	0.496552
	BIY084	20	140.991																t1861t	Y621Y	185	7	0.0378378
																			t1861g	Y621D		178	0.962162
	BIY095	20	128.55																															a2840a	D947D	103	0	0
																																		a2840g	D947G		103	1
	K015	20	122.88																																				g2944g	D982D	85	0	0
																																							g2944a	D982N		35	0.411765
	K026	20	119.019
	K030	20	155.574											t1828t	Y610Y	206	16	0.0776699																					g2944g	D982D	72	47	0.652778
														t1828g	Y610D		189	0.917476																					g2944a	D982N		25	0.347222
	K031	20	158.59
	K085	22	110.18
	K095	20	124.268
	MAL005	22	110.31
	MAL017	22	113.67						t1801t	Y601Y	101	29	0.29																																				a2962a
									t1801g	Y601D		72	0.72																																				a2962g
	MAL038	24	200.669
	MAL040	23	74.43
	MAL051	20	134.399																																									a2956a	N986N	72	44	0.611111
																																												a2956g	N986D		28	0.388889
	MAL079	21	126.047																																				g2944g	D982D	56	7	0.125						a2962a
																																							g2944a	D982N		49	0.875						a2962g
	MAL083	20	153.449																t1861t	Y621Y	156	0	0
																			t1861g	Y621D		156	1
	MAL084	22	113.29
	MAL087	21	122.567
	MAL091	22	105.53											t1828t	Y610Y	193	12	0.0621762
														t1828g	Y610D		181	0.937824
	MAL100	21	118.19																t1861t	Y621Y	131	0	0																					a2956a	N986N	80	49	0.6125
																			t1861g	Y621D		131	1																					a2956g	N986D		30	0.375
	MAL101	21	125.04
< 80%	BIY037	22	114.16																										g2239g	D747D	95	59	0.621053																a2962a
																													g2239a	D747K		36	0.378947																a2962g
	BIY055	23	138.63
	BIY088	22	127.73
	K023	31	189.002
	K048	26	175.713
	MAL010	28	175.713	t13t	Y5Y	24	0	0																					g2239g	D747D	99	39	0.393939
				t13c	Y5H		24	1																					g2239a	D747K		60	0.606061
	MAL012	26	141.22
	MAL013	23	249.17																																														a2962a
																																																	a2962g
	MAL031	22	111.76
Fisher's exact test two-tailed				variant	3D7-type	P			variant	3D7-type	P			variant	3D7-type	P			variant	3D7-type	P			variant	3D7-type	P			variant	3D7-type	P			variant	3D7-type	P			variant	3D7-type	P			variant	3D7-type	P			variant
			≥ 80%	0	22	0.29			1	21	1			2	20	0.574			3	19	0.537			1	21	1			0	22	0.077			1	21	1			3	19	0.537			2	20	0.574			2
			< 80%	1	8				0	9				0	9				0	9				0	9				2	7				0	9				0	9				0	9				2
Number of polymorphic sites				43
[truncated: 149 more columns]

## Sheet: PF3D7_1218300 PfAP2-MU
Table S1-7. PF3D7_1218300 PFAP2-MU
PRR	Sample ID	GC(%)	Sequencing Depth Average (number of read)	PF3D7_1218300 PFAP2-MU
				Nsyn															Syn																Indel
				Position (Nucl)	Position (AA)	N of NGS reads	n	%	Position (Nucl)	Position (AA)	N of NGS reads	n	%	Position (Nucl)	Position (AA)	N of NGS reads	n	%	Position (Nucl)	N of NGS reads	n	%	Position (Nucl)	N of NGS reads	n	%	Position (Nucl)	N of NGS reads	n	%	Position (Nucl)	N of NGS reads	n	%	Position (Nucl)	Position (AA)	N of NGS reads	Position (Nucl)	Position (AA)	N of NGS reads	Position (Nucl)	Position (AA)	N of NGS reads
≥ 80%	BIY016	21	154.523																												a1434a	193	0	0
																															a1434t		182	0.943005
	BIY024	20	135.291																																aataat Ins between t678 & a679	NN between I226 & N227	66/119	aat Ins between c960 & a961	N between N320 & N321	65/115
	BIY084	20	140.991	g479g	S160S	124	12	0.0967742																							a1434a	174	9	0.0517241	aat Ins between t678 & a679	N between I226 & N227	93/119	aat Ins between c960 & a961	N between N320 & N321	80/90
				g479a	S160N		112	0.903226																							a1434t		161	0.925287
	BIY095	20	128.55																																aat Ins between t678 & a679	N between I226 & N227	59/104
	K015	20	122.88																																aat Ins between t678 & a679	N between I226 & N227	83/127
	K026	20	119.019
	K030	20	155.574																																			aat Ins between c960 & a961	N between N320 & N321	54/81
	K031	20	158.59																																aat Ins between t678 & a679	N between I226 & N227	112/159
	K085	22	110.18						a596a	K199K	97	4	0.0412371														a489a	94	5	0.0531915					aat Ins between t678 & a679	N between I226 & N227	47/84
									a596c	K199T		93	0.958763														a489g		89	0.946809
	K095	20	124.268	g479g	S160S	137	0	0						g1009g	A337A	133	0	0					g381g	137	0	0
				g479a	S160N		137	1						g1009t	A337S		133	1					g381c		137	1
	MAL005	22	110.31																																aat Ins between t678 & a679	N between I226 & N227	30/40
	MAL017	22	113.67						a596a	K199K	83	4	0.0481928																						aat Ins between t678 & a679	N between I226 & N227	56/38
									a596c	K199T		79	0.951807
	MAL038	24	200.669																				g381g	128	32	0.25	a489a	135	33	0.244444
																							g381c		95	0.742188	a489g		102	0.755556
	MAL040	23	74.43																												a1434a	91	12	0.131868	aat Ins between t678 & a679	N between I226 & N227	31/51
																															a1434t		79	0.868132
	MAL051	20	134.399																																aat Ins between t678 & a679	N between I226 & N227	54/113
	MAL079	21	126.047						a596a	K199K	134	1	0.00746269																						aat Ins between t678 & a679	N between I226 & N227	67/106
									a596c	K199T		133	0.992537
	MAL083	20	153.449						a596a	K199K	153	84	0.54902										g381g	150	52	0.346667	a489a	153	51	0.333333
									a596c	K199T		69	0.45098										g381c		97	0.646667	a489g		102	0.666667
	MAL084	22	113.29
	MAL087	21	122.567
	MAL091	22	105.53																								a489a	72	5	0.0694444								aat Ins between c960 & a961	N between N320 & N321	74/83
																											a489g		66	0.916667
	MAL100	21	118.19																								a489a	129	5	0.0387597
																											a489g		124	0.96124
	MAL101	21	125.04
< 80%	BIY037	22	114.16																a300a	131	30	0.229008									a1434a	181	68	0.375691	aat Ins between t678 & t679	N between I226 & N227	26/36
																			a300c		101	0.770992									a1434t		111	0.61326
	BIY055	23	138.63																a300a	96	3	0.03125					a489a	98	3	0.0306122											aat Ins between t978 & a979	N between S326 & N327	65/97
																			a300c		93	0.96875					a489g		92	0.938776
	BIY088	22	127.73	g479g	S160S	126	0	0											a300a	117	0	0
				g479a	S160N		126	1											a300c		117	1
	K023	31	189.002																																aat Ins between t678 & t679	N between I226 & N227	16/23
	K048	26	175.713						a596a	K199K	52	0	0																						aat Ins between t678 & t679	N between I226 & N227	39/51
									a596c	K199T		52	1
	MAL010	28	175.713																																aat Ins between t678 & t679	N between I226 & N227	9/12
	MAL012	26	141.22						a596a	K199K	19	0	0														a489a	27	1	0.037037					aat Ins between t678 & t679	N between I226 & N227	11/16
									a596c	K199T		19	1														a489g		26	0.962963
	MAL013	23	249.17						a596a	K199K	126	9	0.0714286																						aat Ins between t678 & t679	N between I226 & N227	49/81
									a596c	K199T		117	0.928571
	MAL031	22	111.76																a300a	141	0	0													aat Ins between t678 & t679	N between I226 & N227	31/43	aat Ins between c960 & a961	N between N320 & N321	62/81
																			a300c		141	1
Fisher's exact test two-tailed				variant	3D7-type	P			variant	3D7-type	P			variant	3D7-type	P			variant	3D7-type	P		variant	3D7-type	P		variant	3D7-type	P		variant	3D7-type	P		variant	3D7-type	P	variant	3D7-type	P	variant	3D7-type	P
			≥ 80%	2	20	1			4	18	0.384			1	21	1			0	22	0.004		3	19	0.537		5	17	1		3	19	1		11	11	0.237	4	18	1	0	22	0.29
			< 80%	1	8				3	6				0	9				4	5			0	9			2	7			1	8			7	2		1	8		1	8
Number of polymorphic sites				10

## Sheet: PF3D7_1451100 eEF2
Table S1-8. Pf3D7_1451100 eEF2
PRR	Sample ID	GC(%)	Sequencing Depth Average (number of read)	Pf3D7_1451100 eEF2
				Syn
				Position (Nucl)	N of NGS reads	n	%	Position (Nucl)	N of NGS reads	n	%	Position (Nucl)	N of NGS reads	n	%	Position (Nucl)	N of NGS reads	n	%	Position (Nucl)	N of NGS reads	n	%
≥ 80%	BIY016	21	154.523
	BIY024	20	135.291
	BIY084	20	140.991
	BIY095	20	128.55
	K015	20	122.88
	K026	20	119.019
	K030	20	155.574
	K031	20	158.59
	K085	22	110.18
	K095	20	124.268
	MAL005	22	110.31
	MAL017	22	113.67
	MAL038	24	200.669
	MAL040	23	74.43
	MAL051	20	134.399													t1563t	183	83	0.453552
																t1563c		93	0.508197
	MAL079	21	126.047
	MAL083	20	153.449					a609a	171	60	0.350877
								a609g		111	0.649123
	MAL084	22	113.29
	MAL087	21	122.567
	MAL091	22	105.53
	MAL100	21	118.19
	MAL101	21	125.04
< 80%	BIY037	22	114.16
	BIY055	23	138.63
	BIY088	22	127.73																	a1974a	239	89	0.372385
																				a1974g		150	0.627615
	K023	31	189.002
	K048	26	175.713
	MAL010	28	175.713	c84c	246	0	0
				c84t		2.46	1
	MAL012	26	141.22
	MAL013	23	249.17
	MAL031	22	111.76									a885a	121	28	0.231405
												a885c		93	0.768595
Fisher's exact test two-tailed				variant	3D7-type	P		variant	3D7-type	P		variant	3D7-type	P		variant	3D7-type	P		variant	3D7-type	P
			≥ 80%	0	22	0.29		1	21	1		0	22	0.29		1	21	1		0	22	0.29
			< 80%	1	8			0	9			1	8			0	9			1	8
Number of polymorphic sites				4

## Sheet: PF3D7_0523000 MDR1
Table S1-9. PF3D7_0523000 PfMDR1
PRR	Sample ID	GC(%)	Sequencing Depth Average (number of read)	PF3D7_0523000 PfMDR1
				Nsyn																																			Syn
				Position (Nucl)	Position (AA)	N of NGS reads	n	%	Position (Nucl)	Position (AA)	N of NGS reads	n	%	Position (Nucl)	Position (AA)	N of NGS reads	n	%	Position (Nucl)	Position (AA)	N of NGS reads	n	%	Position (Nucl)	Position (AA)	N of NGS reads	n	%	Position (Nucl)	Position (AA)	N of NGS reads	n	%	Position (Nucl)	Position (AA)	N of NGS reads	n	%	Position (Nucl)	N of NGS reads	n	%	Position (Nucl)	N of NGS reads	n	%	Position (Nucl)	N of NGS reads	n
≥ 80%	BIY016	21	154.523																					g1948g	D650D	139	6	0.0431655	a1954a	N652N	143	6	0.041958
																								g1948a	D650N		128	0.920863	a1954g	N652D		133	0.93007
	BIY024	20	135.291																																								a210a	135	2	0.0148148
																																											a210c		133	0.985185
	BIY084	20	140.991
	BIY095	20	128.55																																												t3207t	120	0
																																															t3207g		120
	K015	20	122.88																					g1948g	D650D	94	4	0.0425532
																								g1948a	D650N		87	0.925532
	K026	20	119.019						a551a	Y184Y	146	68	0.465753
									a551t	Y184F		78	0.534247
	K030	20	155.574
	K031	20	158.59						a551a	Y184Y	146	0	0
									a551t	Y184F		100	1
	K085	22	110.18
	K095	20	124.268
	MAL005	22	110.31																															g2292g	M764M	149	0	0
																																		g2292a	M764I		149	1
	MAL017	22	113.67						a551a	Y184Y	184	9	0.048913
									a551t	Y184F		171	0.929348
	MAL038	24	200.669						a551a	Y184Y	315	77	0.244444
									a551t	Y184F		235	0.746032
	MAL040	23	74.43						a551a	Y184Y	101	19	0.188119
									a551t	Y184F		82	0.811881
	MAL051	20	134.399						a551a	Y184Y	139	19	0.136691
									a551t	Y184F		120	0.863309
	MAL079	21	126.047
	MAL083	20	153.449
	MAL084	22	113.29
	MAL087	21	122.567						a551a	Y184Y	121	0	0																										c39c	78	0	0
									a551t	Y184F		120	0.991736																										c39g		77	0.987179
	MAL091	22	105.53						a551a	Y184Y	170	0	0
									a551t	Y184F		170	1
	MAL100	21	118.19
	MAL101	21	125.04											g693g	M231M	1146	0	0
														g693t	M231I		144	1
< 80%	BIY037	22	114.16
	BIY055	23	138.63						a551a	Y184Y	217	116	0.534562
									a551t	Y184F		98	0.451613
	BIY088	22	127.73	g488g	S163S	157	35	0.22293
				g488a	S163N		121	0.770701
	K023	31	189.002
	K048	26	175.713																					g1948g	D650D	58	1	0.0172414	a1954a	N652N	56	2	0.0357143
																								g1948a	D650N		55	0.948276	a1954g	N652D		54	0.964286
	MAL010	28	175.713						a551a	Y184Y	437	2	0.00457666
									a551t	Y184F		433	0.990847
	MAL012	26	141.22
	MAL013	23	249.17
	MAL031	22	111.76																t1663t	L555L	132	5	0.0378788
																			t1663g	L555V		127	0.962121
Fisher's exact test two-tailed				variant	3D7-type	P			variant	3D7-type	P			variant	3D7-type	P			variant	3D7-type	P			variant	3D7-type	P			variant	3D7-type	P			variant	3D7-type	P			variant	3D7-type	P		variant	3D7-type	P		variant	3D7-type	P
			≥ 80%	0	22	0.29			8	14	0.677			1	21	1			0	22	0.29			2	20	1			0	22	0.29			1	21	1			1	21	1		1	21	1		1	21	1
			< 80%	1	8				2	7				0	9				1	8				1	8				1	8				0	9				0	9			0	9			0	9
Number of polymorphic sites																																							14
[truncated: 16 more columns]

## Sheet: PF3D7_1447900 MDR2
Table S1-10. PF3D7_1447900 PfMDR2
PRR	Sample ID	GC(%)	Sequencing Depth Average (number of read)	PF3D7_1447900 PfMDR2
				Nsyn
				Position (Nucl)	Position (AA)	N of NGS reads	n	%	Position (Nucl)	Position (AA)	N of NGS reads	n	%	Position (Nucl)	Position (AA)	N of NGS reads	n	%	Position (Nucl)	Position (AA)	N of NGS reads	n	%	Position (Nucl)	Position (AA)	N of NGS reads	n	%	Position (Nucl)	Position (AA)	N of NGS reads	n	%	Position (Nucl)	Position (AA)	N of NGS reads	n	%	Position (Nucl)	Position (AA)	N of NGS reads	n	%	Position (Nucl)	Position (AA)	N of NGS reads	n	%	Position (Nucl)
≥ 80%	BIY016	21	154.523						g623g	S208S	121	0	0																										t1268t	F423F	138	0	0
									g623a	S208N		120	0.991736																										t1268a	F423Y		138	1
	BIY024	20	135.291						g623g	S208S	107	0	0																										t1268t	F423F	167	0	0
									g623a	S208N		106	1																										t1268a	F423Y		166	0.994012
	BIY084	20	140.991						g623g	S208S	156	0	0	g748g	V250V	141	4	0.0283688																					t1268t	F423F	136	0	0
									g623a	S208N		154	0.987179	g748a	V250I		136	0.964539																					t1268a	F423Y		135	0.992647
	BIY095	20	128.55						g623g	S208S	104	0	0	g748g	V250V	62	0	0																					t1268t	F423F	122	0	0
									g623a	S208N		104	1	g748a	V250I		61	0.983871																					t1268a	F423Y		122	1
	K015	20	122.88						g623g	S208S	114	0	0
									g623a	S208N		112	0.982456
	K026	20	119.019						g623g	S208S	124	0	0
									g623a	S208N		124	1
	K030	20	155.574						g623g	S208S	142	0	0																										t1268t	F423F	160	0	0
									g623a	S208N		142	1																										t1268a	F423Y		160	1
	K031	20	158.59						g623g	S208S	137	0	0																										t1268t	F423F	137	0	0
									g623a	S208N		137	1																										t1268a	F423Y		137	1
	K085	22	110.18						g623g	S208S	119	0	0											g925g	D309D	128	83	0.648438
									g623a	S208N		119	1											g925a	D309N		45	0.351562
	K095	20	124.268						g623g	S208S	104	0	0																										t1268t	F423F	122	0	0
									g623a	S208N		104	1																										t1268a	F423Y		122	1
	MAL005	22	110.31						g623g	S208S	121	0	0
									g623a	S208N		121	1
	MAL017	22	113.67						g623g	S208S	66	0	0																										t1268t	F423F	101	1	0.00990099
									g623a	S208N		66	1																										t1268a	F423Y		100	0.990099
	MAL038	24	200.669						g623g	S208S	105	0	0																										t1268t	F423F	224	27	0.120536
									g623a	S208N		105	1																										t1268a	F423Y		197	0.879464
	MAL040	23	74.43						g623g	S208S	61	0	0																a952a	N318N	47	9	0.191489
									g623a	S208N		61	1																a952t	N318Y		38	0.808511
	MAL051	20	134.399						g623g	S208S	152	0	0																										t1268t	F423F	126	64	0.507937
									g623a	S208N		152	1																										t1268a	F423Y		62	0.492063
	MAL079	21	126.047						g623g	S208S	104	0	0											g925g	D309D	61	30	0.491803											t1268t	F423F	102	0	0
									g623a	S208N		103	0.990385											g925a	D309N		31	0.508197											t1268a	F423Y		102	1
	MAL083	20	153.449						g623g	S208S	136	0	0	g748g	V250V	130	41	0.315385
									g623a	S208N		135	0.992647	g748a	V250I		88	0.676923
	MAL084	22	113.29						g623g	S208S	101	0	0																										t1268t	F423F	130	0	0
									g623a	S208N		101	1																										t1268a	F423Y		130	1
	MAL087	21	122.567						g623g	S208S	123	0	0						a889a	R297R	93	3	0.0322581																t1268t	F423F	112	0	0
									g623a	S208N		123	1						a889g	R297G		88	0.946237																t1268a	F423Y		111	0.991071
	MAL091	22	105.53						g623g	S208S	74	0	0																					a1219a	T407T	137	2	0.0145985
									g623a	S208N		74	1																					a1219g	T407A		135	0.985401
	MAL100	21	118.19						g623g	S208S	101	0	0																										t1268t	F423F	102	1	0.00980392
									g623a	S208N		101	1																										t1268a	F423Y		101	0.990196
	MAL101	21	125.04						g623g	S208S	124	0	0	g748g	V250V	112	0	0
									g623a	S208N		124	1	g748a	V250I		112	1
< 80%	BIY037	22	114.16						g623g	S208S	70	0	0																										t1268t	F423F	122	12	0.0983607
									g623a	S208N		70	1																										t1268a	F423Y		110	0.901639
	BIY055	23	138.63	g614g	G205G	54	25	0.462963	g623g	S208S	51	0	0																										t1268t	F423F	180	117	0.65						c1451c
				g614a	G205E		29	0.537037	g623a	S208N		51	1																										t1268a	F423Y		63	0.35						c1451t
	BIY088	22	127.73						g623g	S208S	134	0	0											g925g	D309D	78	44	0.564103											t1268t	F423F	152	44	0.289474
									g623a	S208N		134	1											g925a	D309N		34	0.435897											t1268a	F423Y		108	0.710526
	K023	31	189.002						g623g	S208S	26	0	0
									g623a	S208N		25	0.961538
	K048	26	175.713						g623g	S208S	54	0	0																										t1268t	F423F	126	0	0
									g623a	S208N		54	0.54																										t1268a	F423Y		126	1
	MAL010	28	175.713						g623g	S208S	22	0	0																										t1268t	F423F	159	0	0
									g623a	S208N		22	1																										t1268a	F423Y		159	1
	MAL012	26	141.22						g623g	S208S	31	0	0																										t1268t	F423F	170	62	0.364706	a1354a	S452S	190	81	0.426316
									g623a	S208N		31	1																										t1268a	F423Y		108	0.635294	a1354t	S452C		109	0.573684
	MAL013	23	249.17						g623g	S208S	239	1	0.0041841						a889a	R297R	181	6	0.0331492																t1268t	F423F	268	0	0
									g623a	S208N		235	0.983264						a889g	R297G		174	0.961326																t1268a	F423Y		268	1
	MAL031	22	111.76						g623g	S208S	100	0	0
									g623a	S208N		100	1
Fisher's exact test two-tailed				variant	3D7-type	P			variant	3D7-type	P			variant	3D7-type	P			variant	3D7-type	P			variant	3D7-type	P			variant	3D7-type	P			variant	3D7-type	P			variant	3D7-type	P			variant	3D7-type	P			variant
			≥ 80%	0	22	0.29			22	0	not significant			4	18	0.295			1	21	1			2	20	1			1	21	1			1	21	1			14	8	0.677			0	22	0.29			0
			< 80%	1	8				9	0				0	9				1	8				1	8				0	9				0	9				7	2				1	8				1
Number of polymorphic sites				19
[truncated: 42 more columns]

[truncated: 3 more sheets: PF3D7_0709000 CRT, PF3D7_0417200 DHFR-TS, PF3D7_0810800 PPPK-DHPS]
